# Supplementary material for: Predicting prognosis for epithelial ovarian cancer patients receiving bevacizumab treatment with CT-based deep learning
Source: PubMed Central journal article supplement (PMC11399346; doi:10.1038/s41698-024-00688-6), 2024-09-13
Supplement: 41698_2024_688_MOESM1_ESM.pdf [file 41698_2024_688_MOESM1_ESM.pdf]

## **Supplementary Information**

### **Supplementary Tables:**

**Supplementary Table 1.** Comparison of Model Performances between VIT, DenseNet, ResNet50 and ResNet18 based on the consistency index evaluation criterion. The table below shows the mean and the 95% confidence interval for the training set, internal test set, and external test set.

**Supplementary Table 2.** Comparison of Model Performances between VIT, DenseNet, ResNet50 and ResNet18 based on the training time, memory usage and floating-point operations per second (flops).

**Supplementary Table 3.** Preprocessing for the original DICOM images

**Supplementary Table 4.** The mean and 95% confidence intervals of the consistency index on the split datasets

### **Supplementary Figures:**

**Supplementary Figure1.** The consistency index interval plot

**Supplementary Figure2.** Illustrative examples clarifying the largest tumor segmentation process

**Supplementary Figure3.** The interval plot based on the mean and 95% confidence intervals of the consistency index on the split datasets

## Supplementary Tables

Supplementary Table 1 Comparison of Model Performances between VIT, DenseNet, ResNet50 and ResNet18 based on the consistency index evaluation criterion. The table below shows the mean and the 95% confidence interval for the training set, internal test set, and external test set.

| METHOD   | Training set               | Internal test set          | External test set          |
|----------|----------------------------|----------------------------|----------------------------|
| VIT      | 0.830(0.771, 0.888)        | 0.651(0.621, 0.680)        | 0.537(0.483, 0.591)        |
| DenseNet | 0.871(0.847, 0.896)        | 0.662(0.637, 0.687)        | <b>0.570(0.538, 0.602)</b> |
| ResNet50 | <b>0.884(0.852, 0.916)</b> | 0.676(0.627, 0.725)        | 0.548(0.496, 0.600)        |
| ResNet18 | 0.863(0.821, 0.906)        | <b>0.677(0.630, 0.725)</b> | 0.564(0.484, 0.643)        |

Supplementary Table 2 Comparison of Model Performances between VIT, DenseNet, ResNet50 and ResNet18 based on the training time, memory usage and floating-point operations per second (flops).

| METHOD   | Params(M)   | Flops(GFlops) | Training time(s) |
|----------|-------------|---------------|------------------|
| VIT      | 85.6        | 16.86         | 4.22             |
| DenseNet | 6.95        | 2.89          | 2.60             |
| ResNet50 | 23.5        | 4.13          | 2.23             |
| ResNet18 | <b>11.2</b> | <b>1.8</b>    | <b>0.77</b>      |

Supplementary Table 3 Preprocessing for the original DICOM images

### Algorithm : Windowing Technique for Grayscale

**Input:** CT image, window level WL, window width WW

**Output:** CT image with windowing technique applied  $new\_image$

**Algorithm steps:**

1. Calculate the minimum HU value:  $minHU \leftarrow WL - 0.5 * WW$
2. Window leveling:  $new\_image \leftarrow (image - minHU) / WW$
3. Window clipping:  $new\_image[new\_image \leq 0] = 0$   
 $new\_image[new\_image \leq 1] = 1$
4. Map to the range [0, 255]:  $new\_image = new\_image * 255$

Supplementary Table 4 The mean and 95% confidence intervals of the consistency index on the split datasets

| METHOD             | Training set               | Internal test set          | External test set          |
|--------------------|----------------------------|----------------------------|----------------------------|
| FIGO staging model | 0.489(0.455, 0.524)        | 0.509(0.463, 0.554)        | 0.510(0.468, 0.553)        |
| ResNet18 DL model  | 0.863(0.821, 0.906)        | 0.677(0.630, 0.725)        | 0.564(0.484, 0.643)        |
| LightGBM model     | <b>0.921(0.882, 0.961)</b> | <b>0.732(0.662, 0.802)</b> | <b>0.589(0.533, 0.645)</b> |

## Supplementary Figures

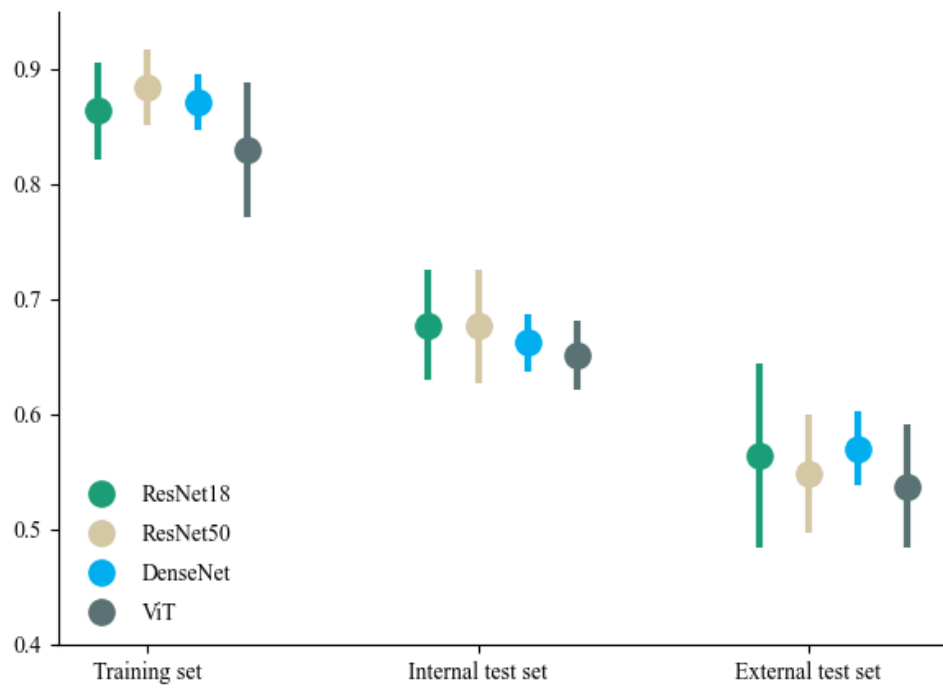

Supplementary Figure 1 The consistency index interval plot

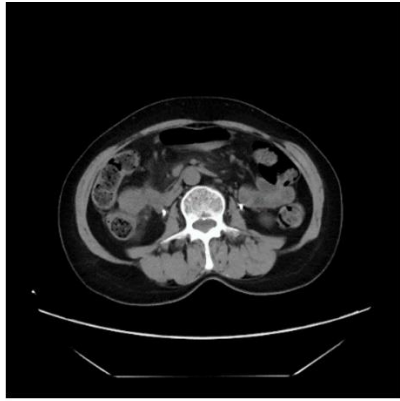

(a)

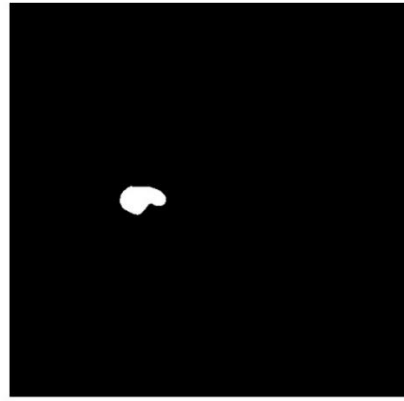

(b)

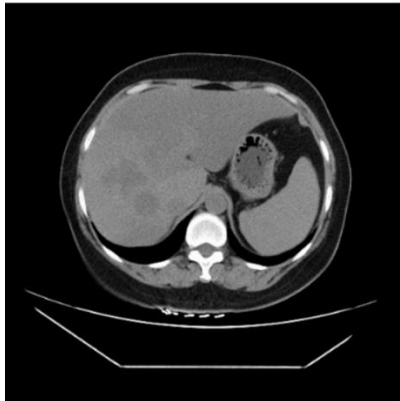

(c)

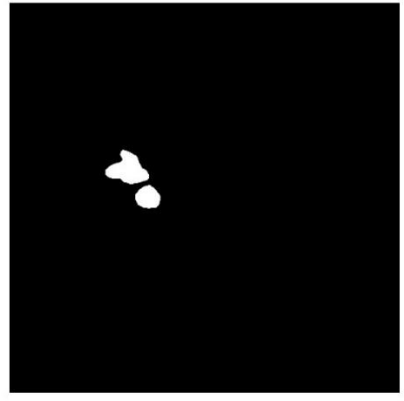

(d)

Supplementary Figure 2 Illustrative examples clarifying the largest tumor segmentation process

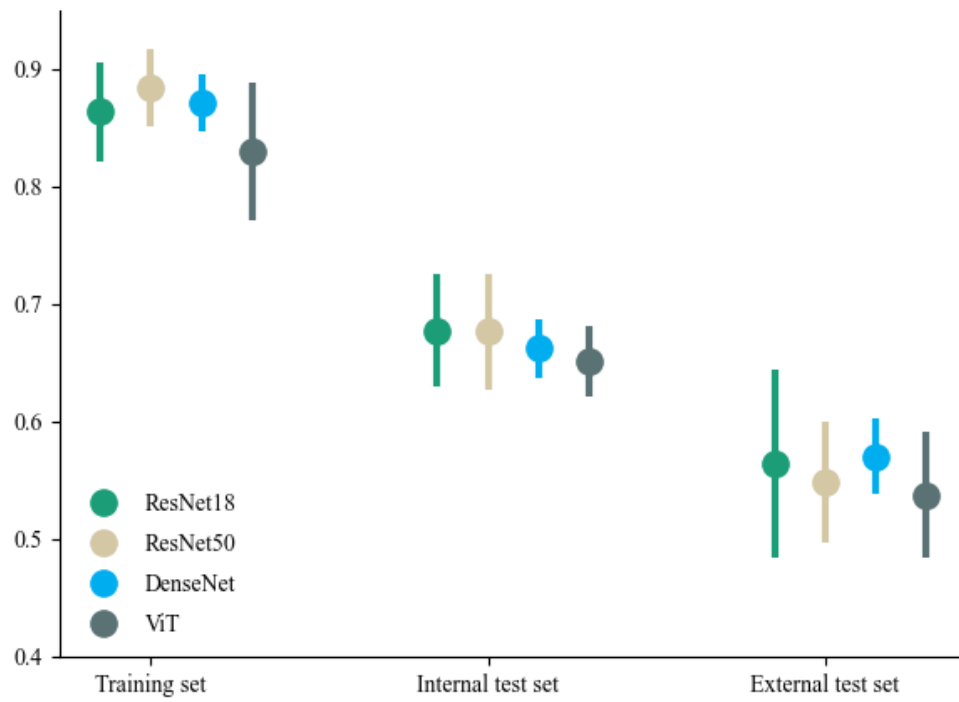

Supplementary Figure 3 The interval plot based on the mean and 95% confidence intervals of the consistency index on the split datasets
